# Supplementary material for: Machine Learning Detects Anti-DENV Signatures in Antibody Repertoire Sequences
Source: Frontiers journal article supplement (doi:10.3389/frai.2021.715462), 2021-10-11
Supplement: Data_Sheet_1.PDF [file Data_Sheet_1.PDF]

## Appendix 1

# Rule library

The following table provides an overview of the physicochemical properties used for the rule-based encoding.

| Rule | Property                    | Value                                       | Amino acid       |
|------|-----------------------------|---------------------------------------------|------------------|
| 1    | Hydropathy                  | neutral                                     | GHPSTY           |
| 2    |                             | hydrophobic                                 | ACFILMVW         |
| 3    |                             | hydrophilic                                 | DEKNQR           |
| 4    | Volume (in Å <sup>3</sup> ) | Very small [60-90] &<br>Small [108-117]     | CDFGNPSTVW       |
| 5    |                             | Medium [138-154]                            | EHQV             |
| 6    |                             | Large [162-174] and<br>Very large [189-228] | FIKLMRWY         |
| 7    | Chemical                    | aliphatic                                   | AGILPV           |
| 8    |                             | aromatic                                    | FWY              |
| 9    |                             | sulfur                                      | CM               |
| 10   |                             | hydroxyl                                    | ST               |
| 11   |                             | basic                                       | HKR              |
| 12   |                             | acidic                                      | DE               |
| 13   |                             | amide                                       | NQ               |
| 14   | Charge                      | positive                                    | HKR              |
| 15   |                             | negative                                    | DE               |
| 16   |                             | no charge                                   | ACFGILMN PQSTVWY |

|    |                                  |                                                                                                                 |            |
|----|----------------------------------|-----------------------------------------------------------------------------------------------------------------|------------|
| 17 |                                  | positive or negative charge                                                                                     | DEHRK      |
| 18 |                                  | polar                                                                                                           | CNQST      |
| 19 |                                  | Polar/uncharged                                                                                                 | CNQSTY     |
| 20 |                                  | polar/charged                                                                                                   | HKR        |
| 21 |                                  | Amphipathic (found on the surface of proteins)                                                                  | MWY        |
| 22 | Hydrogen donor or acceptor atoms | donor                                                                                                           | KRW        |
| 23 |                                  | acceptor                                                                                                        | DE         |
| 24 |                                  | donor and acceptor                                                                                              | HNQSTY     |
| 25 |                                  | none                                                                                                            | ACFGILMPVW |
| 26 | Flexibility                      | Flexibility was scored by Huang, 2003 from 1-10; AA with score of 1-5=flexible (+1) and 6-10 = not flexible (0) | ADEFGLNQST |
| 27 |                                  | Atomic displacement factors/B-factors (Smith, 2003) Flexible +1; Rigid (0)                                      | ACHILMVWY  |
| 28 | Essentiality                     | essential aa (body can't make) (+1); nonessential (body can make)(-1)                                           | FHIKLMTVW  |
| 29 | pKa1= -carboxyl group            | Less than pka1=2.1 (+1); greather than pka1=2.1 = 0 (2.1 is aproximately the median and mean)                   | CDFHNPTW   |

|    |                                                                           |                                                                                                                                                                       |               |
|----|---------------------------------------------------------------------------|-----------------------------------------------------------------------------------------------------------------------------------------------------------------------|---------------|
| 30 | pKa2 = -<br>ammonium<br>ion                                               | Less than pka2=9.2<br>(+1); greater than<br>pka2=9.2 (0) (9.2<br>is approximately the<br>median)                                                                      | CFHKNQRSTY    |
| 31 | pKa3 = side chain<br>group                                                | Less than 10 (+1);<br>greater than 10 (0)                                                                                                                             | DEH           |
| 32 | pI                                                                        | Less than 5.9 (+1);<br>Greater an 5.9 (0)                                                                                                                             | CDEFMNQSTWY   |
| 33 | Percent frequency<br>in vertebrates                                       | Less than 4.9 (0);<br>greater than 4.9 (+1)                                                                                                                           | GADGKLPSTV    |
| 34 | Secondary Struc-<br>ture                                                  | Free energy: alpha<br>sheets propensity<br>kcal/mol (higher<br>number = less likely<br>alpha helix); Greater<br>than 0.55 (0), less<br>than 0.55 (+1)<br>(Pace, 1998) | AEFIKLMQRSTVW |
| 35 |                                                                           | Free energy:alpha<br>sheets propensity<br>kJ/mol (higher<br>number = less likely<br>alpha helix) (+1 for<br>less than 2.5; 0 for<br>greater than 2.5)                 | AEIKLMQRSWY   |
| 37 | Secondary Struc-<br>ture: propensity<br>of location (Fuji-<br>wara, 2012) | alpha-helix favored                                                                                                                                                   | AEKLQ         |
| 38 |                                                                           | alpha-helix breaker                                                                                                                                                   | CDFGNPSTVW    |
| 39 |                                                                           | alpha-helix neutral                                                                                                                                                   | DIMY          |
| 40 | alpha-helix bur-<br>ied residues                                          | alpha-helix breaker                                                                                                                                                   | CDGHNPSTV     |
| 41 |                                                                           | -helix-favored amino<br>acid                                                                                                                                          | AEKLMQR       |

|    |                              |       |                                |             |
|----|------------------------------|-------|--------------------------------|-------------|
| 42 |                              |       | neutral amino acid             | FIWY        |
| 43 | alpha-helix residues         | total | -helix breaker                 | CDGHNPST    |
| 44 |                              |       | -helix-favored amino acid      | AEKLMQR     |
| 45 |                              |       | neutral amino acid             | FIVWY       |
| 46 | beta-strand exposed residues | ex-   | beta-strand breaker            | ADEGNPS     |
| 47 |                              |       | beta-strand-favored amino acid | CFHIKLRTVWY |
| 48 |                              |       | neutral amino acid             | MQ          |
| 49 | beta-strand buried residues  | bur-  | beta-strand breaker            | ADEGMNPQRS  |
| 50 |                              |       | beta-strand-favored amino acid | IVY         |
| 51 |                              |       | neutral amino acid             | CFHKLTW     |
| 52 | beta-strand residues         | total | beta-strand breaker            | ADEGKNPQRS  |
| 53 |                              |       | beta-strand-favored amino acid | CFILTVWY    |
| 54 |                              |       | neutral amino acid             | HM          |
| 55 |                              |       | Non-polar                      | GAVCPLIMWF  |
| 56 | Single acids                 | amino | Alanine                        | A           |
| 57 |                              |       | Cystine                        | C           |
| 58 |                              |       | Aspartic acid                  | D           |
| 59 |                              |       | Glutamic acid                  | E           |
| 60 |                              |       | Phenylalanine                  | F           |
| 61 |                              |       | Glycine                        | G           |
| 62 |                              |       | Histidine                      | H           |
| 63 |                              |       | Isoleucine                     | I           |
| 64 |                              |       | Lysine                         | K           |
| 65 |                              |       | Leucine                        | L           |
| 66 |                              |       | Methionine                     | M           |

|    |                      |                                                                                |           |
|----|----------------------|--------------------------------------------------------------------------------|-----------|
| 67 |                      | Asparagine                                                                     | N         |
| 68 |                      | Proline                                                                        | P         |
| 69 |                      | Glutamine                                                                      | Q         |
| 70 |                      | Arginine                                                                       | R         |
| 71 |                      | Serine                                                                         | S         |
| 72 |                      | Threonine                                                                      | T         |
| 73 |                      | Valine                                                                         | V         |
| 74 |                      | Tryptophan                                                                     | W         |
| 75 |                      | Tyrosine                                                                       | Y         |
| 76 | Repeated amino acids | Amino acids repeated once                                                      | -         |
| 77 |                      | Amino acids repeated three times                                               | -         |
| 78 |                      | Amino acids repeated four times                                                | -         |
| 79 |                      | Alpha helix propensity of variable region, 1 for amino acids with propensity 1 | AEFKLMQRW |
| 80 | Propensity           | Beta sheet propensity of variable region, 1 for amino acids with propensity 1  | CFHILTVWY |
| 81 |                      | Loop propensity of variable region, 1 for amino acids with propensity 1        | DGHNPS    |
| 82 |                      | Hinge propensity of variable region, 1 for amino acids with propensity 1       | AKNPQSTY  |

|    |                                   |                                                    |                 |
|----|-----------------------------------|----------------------------------------------------|-----------------|
| 83 | Solubility                        | Amino acids highly soluble (S100g/100ml)           | CKPT            |
| 84 |                                   | Amino acids intermediately soluble (10S100g/100ml) | AGR             |
| 85 |                                   | Amino acids poorly soluble (S10g/100ml)            | DEHILMNQSVWY    |
| 86 | Molecular weight                  | Amino acids with low MW (100)                      | AG              |
| 87 |                                   | Amino acids with intermediate MW (100MW170)        | CDEFHIKLMNPQSTV |
| 88 |                                   | Amino acids with high MW (MW170)                   | RWY             |
| 89 |                                   | Amino acids with N groups on side chain            | HKNPQRW         |
| 90 |                                   | Branched-chain aminoacids (BCAA)                   | ILV             |
| 91 | Number of possible hydrogen bonds | Amino acids that can make 4 H bonds                | DEHNQRST        |
| 92 |                                   | Amino acids that can make 3 H bonds                | WY              |
| 93 |                                   | Amino acids that can make 2 H bonds                | ACFGIKLMPV      |
